# Supplementary material for: Alternative Protein-Protein Interfaces Are Frequent Exceptions
Source: PLOS journal article supplement (doi:10.1371/journal.pcbi.1002623), 2012-08-02
Supplement: S2 (10.1371/journal.pcbi.1002623.s002) [file journal.pcbi.1002623.s002]

301 Moved Permanently

# Moved Permanently

The document has moved here.

---

Apache Server at www.ploscompbiol.org Port 80
